# Supplementary material for: Mechanisms of isomerization and oxidation in heated trilinolein by DFT method
Source: Royal Society of Chemistry journal article supplement (doi:10.1039/c9ra00328b), 2019-01-01

The Cartesian coordinates of all the located reactants and transition states

1. 9c, 12c

| Center<br>Number | Atomic<br>Number | Atomic<br>Type | Coordinates (Angstroms) |           |           |
|------------------|------------------|----------------|-------------------------|-----------|-----------|
|                  |                  |                | X                       | Y         | Z         |
| 1                | 8                | 0              | -7.823496               | 1.215727  | 0.547621  |
| 2                | 8                | 0              | -6.795833               | 1.036411  | -1.488322 |
| 3                | 6                | 0              | -1.642325               | 1.922856  | -0.372665 |
| 4                | 6                | 0              | -0.377177               | 2.220664  | 0.453039  |
| 5                | 6                | 0              | -2.927550               | 1.879552  | 0.474473  |
| 6                | 6                | 0              | 0.907637                | 2.269320  | -0.393552 |
| 7                | 6                | 0              | -4.187399               | 1.574992  | -0.355848 |
| 8                | 6                | 0              | 2.176659                | 2.552555  | 0.445432  |
| 9                | 6                | 0              | -5.456386               | 1.537222  | 0.506381  |
| 10               | 6                | 0              | 2.784554                | -2.884201 | -0.443916 |
| 11               | 6                | 0              | 1.577222                | -3.537108 | 0.252625  |
| 12               | 6                | 0              | 3.420305                | 2.679601  | -0.400037 |
| 13               | 6                | 0              | 3.780456                | -2.231497 | 0.545010  |
| 14               | 6                | 0              | 0.586698                | -4.193471 | -0.727754 |
| 15               | 6                | 0              | 4.545115                | 1.943536  | -0.340017 |
| 16               | 6                | 0              | 4.856315                | 0.795331  | 0.600582  |
| 17               | 6                | 0              | 4.993891                | -1.661378 | -0.147969 |
| 18               | 6                | 0              | -6.707503               | 1.240495  | -0.273852 |
| 19               | 6                | 0              | 5.443708                | -0.393316 | -0.133292 |
| 20               | 6                | 0              | -0.619194               | -4.840819 | -0.025928 |
| 21               | 1                | 0              | -1.751892               | 2.686129  | -1.158471 |
| 22               | 1                | 0              | -1.518216               | 0.960364  | -0.892443 |
| 23               | 1                | 0              | -0.502784               | 3.181507  | 0.976683  |
| 24               | 1                | 0              | -0.267115               | 1.454255  | 1.236409  |
| 25               | 1                | 0              | -2.814988               | 1.119153  | 1.263356  |
| 26               | 1                | 0              | -3.052747               | 2.844213  | 0.991100  |
| 27               | 1                | 0              | 0.804879                | 3.044714  | -1.168228 |
| 28               | 1                | 0              | 1.036980                | 1.315701  | -0.925695 |
| 29               | 1                | 0              | -4.069157               | 0.613097  | -0.872095 |
| 30               | 1                | 0              | -4.304965               | 2.329989  | -1.144469 |
| 31               | 1                | 0              | 2.291085                | 1.766627  | 1.202352  |
| 32               | 1                | 0              | 2.022472                | 3.492596  | 1.000453  |
| 33               | 1                | 0              | -5.607440               | 2.493577  | 1.027094  |
| 34               | 1                | 0              | -5.370883               | 0.780850  | 1.299551  |
| 35               | 1                | 0              | 2.433938                | -2.120875 | -1.153816 |
| 36               | 1                | 0              | 3.314091                | -3.642591 | -1.041057 |
| 37               | 1                | 0              | 1.934979                | -4.295730 | 0.966848  |
| 38               | 1                | 0              | 1.045776                | -2.778515 | 0.848892  |

|    |   |   |           |           |           |
|----|---|---|-----------|-----------|-----------|
| 39 | 1 | 0 | 3.376852  | 3.471187  | -1.151043 |
| 40 | 1 | 0 | 3.258324  | -1.462080 | 1.127116  |
| 41 | 1 | 0 | 4.103641  | -2.998915 | 1.267499  |
| 42 | 1 | 0 | 1.117211  | -4.953296 | -1.321151 |
| 43 | 1 | 0 | 0.232010  | -3.436565 | -1.443323 |
| 44 | 1 | 0 | 5.346140  | 2.182541  | -1.041685 |
| 45 | 1 | 0 | 3.970300  | 0.505304  | 1.171658  |
| 46 | 1 | 0 | 5.597459  | 1.142857  | 1.342196  |
| 47 | 1 | 0 | 5.556204  | -2.386348 | -0.740312 |
| 48 | 1 | 0 | 6.339026  | -0.166139 | -0.714976 |
| 49 | 1 | 0 | -0.295209 | -5.622170 | 0.673993  |
| 50 | 1 | 0 | -1.302983 | -5.301583 | -0.749024 |
| 51 | 1 | 0 | -1.188577 | -4.096651 | 0.546157  |
| 52 | 1 | 0 | -8.634607 | 1.021625  | 0.029220  |

---

## 2. 9c,12t

| Center<br>Number | Atomic<br>Number | Atomic<br>Type | Coordinates (Angstroms) |           |           |
|------------------|------------------|----------------|-------------------------|-----------|-----------|
|                  |                  |                | X                       | Y         | Z         |
| 1                | 8                | 0              | 5.639770                | 1.542971  | -3.682633 |
| 2                | 8                | 0              | 6.083342                | 2.745627  | -1.787148 |
| 3                | 6                | 0              | 2.478242                | -1.911974 | -0.833615 |
| 4                | 6                | 0              | 1.090318                | -2.377003 | -0.354765 |
| 5                | 6                | 0              | 2.530455                | -0.412259 | -1.180238 |
| 6                | 6                | 0              | 1.038448                | -3.876991 | -0.013200 |
| 7                | 6                | 0              | 3.919850                | 0.047953  | -1.656582 |
| 8                | 6                | 0              | -0.346508               | -4.356396 | 0.489655  |
| 9                | 6                | 0              | 3.948785                | 1.562404  | -1.987181 |
| 10               | 6                | 0              | -3.948556               | 1.672491  | 1.467176  |
| 11               | 6                | 0              | -4.241622               | 3.175075  | 1.298953  |
| 12               | 6                | 0              | -0.718657               | -3.781537 | 1.836004  |
| 13               | 6                | 0              | -3.678457               | 0.964979  | 0.128553  |
| 14               | 6                | 0              | -4.525349               | 3.897070  | 2.629653  |
| 15               | 6                | 0              | -1.835844               | -3.115884 | 2.181670  |
| 16               | 6                | 0              | -3.020087               | -2.764897 | 1.303687  |
| 17               | 6                | 0              | -3.381003               | -0.516466 | 0.199010  |
| 18               | 6                | 0              | 5.306045                | 2.029892  | -2.427427 |
| 19               | 6                | 0              | -3.320402               | -1.278697 | 1.302477  |
| 20               | 6                | 0              | -4.816628               | 5.396949  | 2.452849  |
| 21               | 1                | 0              | 3.222624                | -2.129158 | -0.051724 |
| 22               | 1                | 0              | 2.776310                | -2.499029 | -1.716376 |
| 23               | 1                | 0              | 0.791527                | -1.791730 | 0.526485  |

|    |   |   |           |           |           |
|----|---|---|-----------|-----------|-----------|
| 24 | 1 | 0 | 0.344933  | -2.159470 | -1.135917 |
| 25 | 1 | 0 | 1.787420  | -0.194199 | -1.963020 |
| 26 | 1 | 0 | 2.233221  | 0.173873  | -0.297209 |
| 27 | 1 | 0 | 1.796314  | -4.102932 | 0.753203  |
| 28 | 1 | 0 | 1.313193  | -4.461998 | -0.903327 |
| 29 | 1 | 0 | 4.215736  | -0.519662 | -2.547871 |
| 30 | 1 | 0 | 4.663886  | -0.165484 | -0.876196 |
| 31 | 1 | 0 | -0.320428 | -5.455095 | 0.568212  |
| 32 | 1 | 0 | -1.106484 | -4.120278 | -0.265578 |
| 33 | 1 | 0 | 3.669567  | 2.147465  | -1.106094 |
| 34 | 1 | 0 | 3.227996  | 1.769876  | -2.787597 |
| 35 | 1 | 0 | -4.801201 | 1.192519  | 1.970451  |
| 36 | 1 | 0 | -3.080963 | 1.545768  | 2.131779  |
| 37 | 1 | 0 | -3.387297 | 3.659794  | 0.800603  |
| 38 | 1 | 0 | -5.104863 | 3.304907  | 0.627248  |
| 39 | 1 | 0 | 0.030654  | -3.943294 | 2.614554  |
| 40 | 1 | 0 | -4.544287 | 1.117220  | -0.537309 |
| 41 | 1 | 0 | -2.836308 | 1.466471  | -0.377292 |
| 42 | 1 | 0 | -3.663782 | 3.767323  | 3.301817  |
| 43 | 1 | 0 | -5.379844 | 3.413802  | 3.126963  |
| 44 | 1 | 0 | -1.924348 | -2.777010 | 3.215607  |
| 45 | 1 | 0 | -3.904282 | -3.305498 | 1.684305  |
| 46 | 1 | 0 | -2.867943 | -3.110560 | 0.275300  |
| 47 | 1 | 0 | -3.199860 | -0.991484 | -0.768558 |
| 48 | 1 | 0 | -3.490483 | -0.833505 | 2.283228  |
| 49 | 1 | 0 | -3.965063 | 5.912256  | 1.989756  |
| 50 | 1 | 0 | -5.017635 | 5.881739  | 3.415826  |
| 51 | 1 | 0 | -5.691715 | 5.554892  | 1.809011  |
| 52 | 1 | 0 | 6.537592  | 1.841955  | -3.944944 |

---

3. 9t, 12c

---

| Center<br>Number | Atomic<br>Number | Atomic<br>Type | Coordinates (Angstroms) |          |           |
|------------------|------------------|----------------|-------------------------|----------|-----------|
|                  |                  |                | X                       | Y        | Z         |
| 1                | 8                | 0              | -7.140337               | 5.534593 | -0.500779 |
| 2                | 8                | 0              | -5.860819               | 6.141080 | 1.296071  |
| 3                | 6                | 0              | -1.561424               | 2.988563 | 0.892510  |
| 4                | 6                | 0              | -0.613446               | 1.903734 | 0.347786  |
| 5                | 6                | 0              | -2.849637               | 3.149486 | 0.064061  |
| 6                | 6                | 0              | 0.679681                | 1.766379 | 1.173772  |
| 7                | 6                | 0              | -3.791957               | 4.231506 | 0.621286  |
| 8                | 6                | 0              | 1.689282                | 0.726953 | 0.621809  |
| 9                | 6                | 0              | -5.064945               | 4.384564 | -0.222282 |

|    |   |   |           |            |           |
|----|---|---|-----------|------------|-----------|
| 10 | 6 | 0 | 0.806298  | -6.854084  | -0.689209 |
| 11 | 6 | 0 | 0.047611  | -7.187263  | 0.607784  |
| 12 | 6 | 0 | 1.204098  | -0.702120  | 0.673930  |
| 13 | 6 | 0 | 1.286693  | -5.382490  | -0.774970 |
| 14 | 6 | 0 | -0.426555 | -8.651260  | 0.678096  |
| 15 | 6 | 0 | 1.752732  | -1.669309  | 1.426816  |
| 16 | 6 | 0 | 1.270446  | -3.104087  | 1.495632  |
| 17 | 6 | 0 | 2.369921  | -5.050011  | 0.223096  |
| 18 | 6 | 0 | -6.011323 | 5.431894   | 0.296690  |
| 19 | 6 | 0 | 2.368170  | -4.098677  | 1.174684  |
| 20 | 6 | 0 | -1.196124 | -8.974774  | 1.970221  |
| 21 | 1 | 0 | -1.827570 | 2.747670   | 1.933253  |
| 22 | 1 | 0 | -1.029643 | 3.952168   | 0.925054  |
| 23 | 1 | 0 | -1.146282 | 0.941905   | 0.325324  |
| 24 | 1 | 0 | -0.351876 | 2.140708   | -0.695924 |
| 25 | 1 | 0 | -2.582305 | 3.395100   | -0.975837 |
| 26 | 1 | 0 | -3.379776 | 2.184708   | 0.027274  |
| 27 | 1 | 0 | 0.425631  | 1.500454   | 2.210296  |
| 28 | 1 | 0 | 1.178954  | 2.746359   | 1.213115  |
| 29 | 1 | 0 | -3.266743 | 5.194823   | 0.666008  |
| 30 | 1 | 0 | -4.067487 | 3.987886   | 1.655903  |
| 31 | 1 | 0 | 2.626234  | 0.808456   | 1.189764  |
| 32 | 1 | 0 | 1.929252  | 0.996921   | -0.419400 |
| 33 | 1 | 0 | -5.616896 | 3.435363   | -0.278071 |
| 34 | 1 | 0 | -4.819449 | 4.643175   | -1.262159 |
| 35 | 1 | 0 | 0.156906  | -7.062774  | -1.552325 |
| 36 | 1 | 0 | 1.675536  | -7.523316  | -0.785497 |
| 37 | 1 | 0 | 0.690540  | -6.970864  | 1.473322  |
| 38 | 1 | 0 | -0.825277 | -6.520845  | 0.696586  |
| 39 | 1 | 0 | 0.343791  | -0.948510  | 0.048235  |
| 40 | 1 | 0 | 1.679198  | -5.208488  | -1.789411 |
| 41 | 1 | 0 | 0.422709  | -4.716400  | -0.659555 |
| 42 | 1 | 0 | 0.445475  | -9.317347  | 0.594046  |
| 43 | 1 | 0 | -1.064577 | -8.868074  | -0.192190 |
| 44 | 1 | 0 | 2.621245  | -1.431304  | 2.046070  |
| 45 | 1 | 0 | 0.408606  | -3.234746  | 0.832333  |
| 46 | 1 | 0 | 0.909660  | -3.306784  | 2.519198  |
| 47 | 1 | 0 | 3.261467  | -5.676282  | 0.142038  |
| 48 | 1 | 0 | 3.256598  | -4.007783  | 1.802504  |
| 49 | 1 | 0 | -0.570967 | -8.799823  | 2.855455  |
| 50 | 1 | 0 | -1.521278 | -10.022074 | 1.991322  |
| 51 | 1 | 0 | -2.090003 | -8.344349  | 2.064013  |
| 52 | 1 | 0 | -7.752062 | 6.220003   | -0.153909 |

---

## 4. 9t,12t

---

| Center<br>Number | Atomic<br>Number | Atomic<br>Type | Coordinates (Angstroms) |           |           |
|------------------|------------------|----------------|-------------------------|-----------|-----------|
|                  |                  |                | X                       | Y         | Z         |
| 1                | 8                | 0              | 6.790272                | 3.219704  | 0.045934  |
| 2                | 8                | 0              | 7.322354                | 1.088960  | 0.686106  |
| 3                | 6                | 0              | 2.822216                | -1.652704 | -0.228825 |
| 4                | 6                | 0              | 1.377497                | -1.940997 | -0.679042 |
| 5                | 6                | 0              | 3.237320                | -0.182652 | -0.421355 |
| 6                | 6                | 0              | 0.961402                | -3.410222 | -0.476576 |
| 7                | 6                | 0              | 4.686994                | 0.098252  | 0.014053  |
| 8                | 6                | 0              | -0.446853               | -3.756323 | -1.025119 |
| 9                | 6                | 0              | 5.076423                | 1.569936  | -0.179030 |
| 10               | 6                | 0              | -4.236997               | 1.412666  | 0.176035  |
| 11               | 6                | 0              | -4.399880               | 2.942339  | 0.099170  |
| 12               | 6                | 0              | -1.579855               | -3.049382 | -0.320355 |
| 13               | 6                | 0              | -4.007524               | 0.909929  | 1.611325  |
| 14               | 6                | 0              | -4.618040               | 3.464740  | -1.333283 |
| 15               | 6                | 0              | -2.570082               | -3.669051 | 0.342354  |
| 16               | 6                | 0              | -3.724878               | -3.002241 | 1.068059  |
| 17               | 6                | 0              | -3.834660               | -0.582769 | 1.782580  |
| 18               | 6                | 0              | 6.489280                | 1.879634  | 0.233114  |
| 19               | 6                | 0              | -3.880314               | -1.520805 | 0.822575  |
| 20               | 6                | 0              | -4.778177               | 4.992978  | -1.401210 |
| 21               | 1                | 0              | 2.933852                | -1.925147 | 0.831998  |
| 22               | 1                | 0              | 3.513542                | -2.301444 | -0.788781 |
| 23               | 1                | 0              | 0.692889                | -1.280557 | -0.127387 |
| 24               | 1                | 0              | 1.272320                | -1.679958 | -1.744429 |
| 25               | 1                | 0              | 3.112925                | 0.092235  | -1.480738 |
| 26               | 1                | 0              | 2.551009                | 0.463836  | 0.148017  |
| 27               | 1                | 0              | 0.999831                | -3.658214 | 0.594246  |
| 28               | 1                | 0              | 1.696468                | -4.058652 | -0.977028 |
| 29               | 1                | 0              | 5.376613                | -0.538927 | -0.555324 |
| 30               | 1                | 0              | 4.818876                | -0.178317 | 1.068529  |
| 31               | 1                | 0              | -0.599502               | -4.842335 | -0.956589 |
| 32               | 1                | 0              | -0.466834               | -3.504841 | -2.098521 |
| 33               | 1                | 0              | 4.409932                | 2.231858  | 0.392037  |
| 34               | 1                | 0              | 4.961692                | 1.872831  | -1.229644 |
| 35               | 1                | 0              | -3.392554               | 1.107128  | -0.459673 |
| 36               | 1                | 0              | -5.133578               | 0.932409  | -0.243286 |
| 37               | 1                | 0              | -5.249210               | 3.250615  | 0.729014  |
| 38               | 1                | 0              | -3.507343               | 3.425937  | 0.526759  |
| 39               | 1                | 0              | -1.574950               | -1.960211 | -0.361643 |

|    |   |   |           |           |           |
|----|---|---|-----------|-----------|-----------|
| 40 | 1 | 0 | -3.120250 | 1.414293  | 2.029308  |
| 41 | 1 | 0 | -4.848275 | 1.239687  | 2.244555  |
| 42 | 1 | 0 | -5.509981 | 2.982972  | -1.761389 |
| 43 | 1 | 0 | -3.769428 | 3.156685  | -1.962565 |
| 44 | 1 | 0 | -2.572751 | -4.760861 | 0.383831  |
| 45 | 1 | 0 | -3.625357 | -3.187165 | 2.149585  |
| 46 | 1 | 0 | -4.653603 | -3.517276 | 0.768375  |
| 47 | 1 | 0 | -3.656916 | -0.905147 | 2.811696  |
| 48 | 1 | 0 | -4.051591 | -1.232388 | -0.214709 |
| 49 | 1 | 0 | -5.639667 | 5.326017  | -0.807840 |
| 50 | 1 | 0 | -4.930421 | 5.333762  | -2.432457 |
| 51 | 1 | 0 | -3.887310 | 5.500589  | -1.008811 |
| 52 | 1 | 0 | 7.714219  | 3.411134  | 0.317952  |

## 5. Tsa1

| Center<br>Number | Atomic<br>Number | Atomic<br>Type | Coordinates (Angstroms) |           |           |
|------------------|------------------|----------------|-------------------------|-----------|-----------|
|                  |                  |                | X                       | Y         | Z         |
| 1                | 8                | 0              | -8.417561               | 2.903665  | 0.349724  |
| 2                | 8                | 0              | -7.273107               | 3.642767  | -1.488021 |
| 3                | 6                | 0              | -2.147263               | 2.923702  | -0.144341 |
| 4                | 6                | 0              | -0.920858               | 2.523638  | 0.696457  |
| 5                | 6                | 0              | -3.487087               | 2.657139  | 0.566624  |
| 6                | 6                | 0              | 0.420777                | 2.807415  | -0.003246 |
| 7                | 6                | 0              | -4.709640               | 3.054158  | -0.280222 |
| 8                | 6                | 0              | 1.646823                | 2.397849  | 0.845560  |
| 9                | 6                | 0              | -6.033118               | 2.787731  | 0.449738  |
| 10               | 6                | 0              | 3.410814                | -3.717076 | -1.228327 |
| 11               | 6                | 0              | 2.455387                | -4.713603 | -0.547668 |
| 12               | 6                | 0              | 2.960401                | 2.772370  | 0.201644  |
| 13               | 6                | 0              | 3.801182                | -2.531243 | -0.325063 |
| 14               | 6                | 0              | 2.071342                | -5.902681 | -1.448444 |
| 15               | 6                | 0              | 4.022580                | 1.983151  | -0.042283 |
| 16               | 6                | 0              | 4.165522                | 0.509833  | 0.266917  |
| 17               | 6                | 0              | 4.790142                | -1.579178 | -0.985762 |
| 18               | 6                | 0              | -7.249951               | 3.162771  | -0.350744 |
| 19               | 6                | 0              | 5.067957                | -0.216556 | -0.710934 |
| 20               | 6                | 0              | 1.108339                | -6.889570 | -0.767185 |
| 21               | 1                | 0              | -2.079462               | 3.992456  | -0.399648 |
| 22               | 1                | 0              | -2.127995               | 2.376428  | -1.099375 |
| 23               | 1                | 0              | -0.947939               | 3.062188  | 1.656868  |

|    |   |   |           |           |           |
|----|---|---|-----------|-----------|-----------|
| 24 | 1 | 0 | -0.983812 | 1.451633  | 0.941951  |
| 25 | 1 | 0 | -3.552347 | 1.588832  | 0.826963  |
| 26 | 1 | 0 | -3.505817 | 3.208873  | 1.519665  |
| 27 | 1 | 0 | 0.487993  | 3.880545  | -0.239545 |
| 28 | 1 | 0 | 0.455932  | 2.276594  | -0.966026 |
| 29 | 1 | 0 | -4.699781 | 2.502735  | -1.229715 |
| 30 | 1 | 0 | -4.648427 | 4.117692  | -0.546405 |
| 31 | 1 | 0 | 1.600990  | 1.320732  | 1.052663  |
| 32 | 1 | 0 | 1.571689  | 2.899018  | 1.825440  |
| 33 | 1 | 0 | -6.076270 | 3.338898  | 1.399912  |
| 34 | 1 | 0 | -6.126781 | 1.726477  | 0.720959  |
| 35 | 1 | 0 | 2.941434  | -3.333297 | -2.147196 |
| 36 | 1 | 0 | 4.322605  | -4.246550 | -1.545099 |
| 37 | 1 | 0 | 2.922393  | -5.093959 | 0.374437  |
| 38 | 1 | 0 | 1.540232  | -4.186282 | -0.235636 |
| 39 | 1 | 0 | 3.036391  | 3.821245  | -0.092330 |
| 40 | 1 | 0 | 2.898921  | -1.994653 | -0.004100 |
| 41 | 1 | 0 | 4.272394  | -2.912596 | 0.595478  |
| 42 | 1 | 0 | 2.985291  | -6.433552 | -1.754242 |
| 43 | 1 | 0 | 1.612143  | -5.521251 | -2.372819 |
| 44 | 1 | 0 | 4.900848  | 2.417146  | -0.517548 |
| 45 | 1 | 0 | 3.182580  | 0.043541  | 0.444220  |
| 46 | 1 | 0 | 4.715486  | 0.399690  | 1.224079  |
| 47 | 1 | 0 | 5.524462  | -2.090153 | -1.618063 |
| 48 | 1 | 0 | 4.452739  | -0.695962 | -1.857203 |
| 49 | 1 | 0 | 1.553716  | -7.310975 | 0.143392  |
| 50 | 1 | 0 | 0.854953  | -7.723650 | -1.432351 |
| 51 | 1 | 0 | 0.171983  | -6.393028 | -0.481254 |
| 52 | 1 | 0 | -9.205564 | 3.152287  | -0.180925 |

---

## 6. Tsa2

---

| Center<br>Number | Atomic<br>Number | Atomic<br>Type | Coordinates (Angstroms) |           |           |
|------------------|------------------|----------------|-------------------------|-----------|-----------|
|                  |                  |                | X                       | Y         | Z         |
| 1                | 8                | 0              | 8.768065                | -0.624602 | -1.990616 |
| 2                | 8                | 0              | 9.257819                | -1.244407 | 0.156958  |
| 3                | 6                | 0              | 3.480407                | -1.820885 | -1.247473 |
| 4                | 6                | 0              | 2.038215                | -1.388051 | -0.923798 |
| 5                | 6                | 0              | 4.544290                | -0.879988 | -0.651667 |
| 6                | 6                | 0              | 0.973894                | -2.317307 | -1.534492 |
| 7                | 6                | 0              | 5.984203                | -1.316855 | -0.975343 |
| 8                | 6                | 0              | -0.482216               | -1.900741 | -1.203602 |
| 9                | 6                | 0              | 7.034810                | -0.357095 | -0.360268 |

|    |   |   |           |           |           |
|----|---|---|-----------|-----------|-----------|
| 10 | 6 | 0 | -5.909265 | 1.670059  | 0.573670  |
| 11 | 6 | 0 | -7.408366 | 1.956524  | 0.777910  |
| 12 | 6 | 0 | -0.832882 | -2.070920 | 0.255748  |
| 13 | 6 | 0 | -5.508968 | 0.266825  | 1.053571  |
| 14 | 6 | 0 | -7.829021 | 3.357434  | 0.294876  |
| 15 | 6 | 0 | -1.282213 | -1.136215 | 1.115849  |
| 16 | 6 | 0 | -1.552056 | 0.325153  | 0.828975  |
| 17 | 6 | 0 | -4.033526 | -0.094079 | 0.940611  |
| 18 | 6 | 0 | 8.444792  | -0.783805 | -0.651207 |
| 19 | 6 | 0 | -2.993410 | 0.846770  | 0.783702  |
| 20 | 6 | 0 | -9.325391 | 3.645162  | 0.503724  |
| 21 | 1 | 0 | 3.646321  | -2.841679 | -0.869478 |
| 22 | 1 | 0 | 3.610784  | -1.869957 | -2.339793 |
| 23 | 1 | 0 | 1.905049  | -1.347967 | 0.166864  |
| 24 | 1 | 0 | 1.875598  | -0.363416 | -1.293809 |
| 25 | 1 | 0 | 4.379879  | 0.140179  | -1.031772 |
| 26 | 1 | 0 | 4.413427  | -0.830175 | 0.440194  |
| 27 | 1 | 0 | 1.142237  | -3.347041 | -1.182630 |
| 28 | 1 | 0 | 1.094904  | -2.338540 | -2.627477 |
| 29 | 1 | 0 | 6.127039  | -1.355566 | -2.062606 |
| 30 | 1 | 0 | 6.154343  | -2.332513 | -0.591095 |
| 31 | 1 | 0 | -1.161343 | -2.526838 | -1.803915 |
| 32 | 1 | 0 | -0.645454 | -0.866531 | -1.532349 |
| 33 | 1 | 0 | 6.921347  | -0.317057 | 0.726958  |
| 34 | 1 | 0 | 6.881307  | 0.650951  | -0.764834 |
| 35 | 1 | 0 | -5.302774 | 2.418262  | 1.097661  |
| 36 | 1 | 0 | -5.658246 | 1.779478  | -0.492361 |
| 37 | 1 | 0 | -8.007137 | 1.198557  | 0.247641  |
| 38 | 1 | 0 | -7.658403 | 1.854546  | 1.846091  |
| 39 | 1 | 0 | -0.691805 | -3.085760 | 0.636099  |
| 40 | 1 | 0 | -5.761216 | 0.159872  | 2.121520  |
| 41 | 1 | 0 | -6.106455 | -0.496887 | 0.532461  |
| 42 | 1 | 0 | -7.580716 | 3.460220  | -0.772115 |
| 43 | 1 | 0 | -7.231498 | 4.114549  | 0.823862  |
| 44 | 1 | 0 | -1.487179 | -1.456816 | 2.139004  |
| 45 | 1 | 0 | -1.049421 | 0.654567  | -0.088088 |
| 46 | 1 | 0 | -1.090859 | 0.939223  | 1.620251  |
| 47 | 1 | 0 | -3.828902 | -1.150673 | 1.179110  |
| 48 | 1 | 0 | -3.695247 | 0.314076  | -0.245815 |
| 49 | 1 | 0 | -9.946450 | 2.922774  | -0.042133 |
| 50 | 1 | 0 | -9.592419 | 4.649001  | 0.151880  |
| 51 | 1 | 0 | -9.594899 | 3.579990  | 1.566074  |
| 52 | 1 | 0 | 9.685940  | -0.926453 | -2.165663 |

---



## 7. Tsa3

| Center<br>Number | Atomic<br>Number | Atomic<br>Type | Coordinates (Angstroms) |           |           |
|------------------|------------------|----------------|-------------------------|-----------|-----------|
|                  |                  |                | X                       | Y         | Z         |
| 1                | 8                | 0              | 5.647440                | 1.319540  | -3.735339 |
| 2                | 8                | 0              | 6.016767                | 2.666482  | -1.922661 |
| 3                | 6                | 0              | 2.505800                | -2.016825 | -0.744696 |
| 4                | 6                | 0              | 1.114297                | -2.491476 | -0.285215 |
| 5                | 6                | 0              | 2.527744                | -0.541630 | -1.186447 |
| 6                | 6                | 0              | 1.096201                | -3.968066 | 0.150478  |
| 7                | 6                | 0              | 3.917921                | -0.075588 | -1.654778 |
| 8                | 6                | 0              | -0.294984               | -4.470298 | 0.611764  |
| 9                | 6                | 0              | 3.918116                | 1.414511  | -2.081843 |
| 10               | 6                | 0              | -3.980095               | 1.854406  | 1.454044  |
| 11               | 6                | 0              | -4.358985               | 3.345687  | 1.386552  |
| 12               | 6                | 0              | -0.733671               | -3.794474 | 1.906894  |
| 13               | 6                | 0              | -3.448996               | 1.312255  | 0.116404  |
| 14               | 6                | 0              | -4.903718               | 3.899007  | 2.716846  |
| 15               | 6                | 0              | -1.726821               | -2.810715 | 2.150785  |
| 16               | 6                | 0              | -2.702982               | -2.467518 | 1.035406  |
| 17               | 6                | 0              | -3.050583               | -0.147065 | 0.097635  |
| 18               | 6                | 0              | 5.273115                | 1.885888  | -2.525632 |
| 19               | 6                | 0              | -3.108084               | -1.010280 | 1.124237  |
| 20               | 6                | 0              | -5.277749               | 5.389196  | 2.644314  |
| 21               | 1                | 0              | 3.226834                | -2.160585 | 0.074836  |
| 22               | 1                | 0              | 2.851076                | -2.650239 | -1.576619 |
| 23               | 1                | 0              | 0.770206                | -1.855845 | 0.543511  |
| 24               | 1                | 0              | 0.393769                | -2.348374 | -1.105341 |
| 25               | 1                | 0              | 1.802407                | -0.395721 | -2.001804 |
| 26               | 1                | 0              | 2.189861                | 0.091575  | -0.352166 |
| 27               | 1                | 0              | 1.822197                | -4.118425 | 0.964555  |
| 28               | 1                | 0              | 1.434226                | -4.596890 | -0.685838 |
| 29               | 1                | 0              | 4.252597                | -0.690792 | -2.499558 |
| 30               | 1                | 0              | 4.645215                | -0.218408 | -0.843162 |
| 31               | 1                | 0              | -0.236249               | -5.554022 | 0.785130  |
| 32               | 1                | 0              | -1.028273               | -4.314198 | -0.187752 |
| 33               | 1                | 0              | 3.606567                | 2.048377  | -1.246613 |
| 34               | 1                | 0              | 3.209989                | 1.552362  | -2.908254 |
| 35               | 1                | 0              | -4.860951               | 1.271451  | 1.761543  |
| 36               | 1                | 0              | -3.220858               | 1.708469  | 2.236257  |
| 37               | 1                | 0              | -3.477071               | 3.933154  | 1.085825  |
| 38               | 1                | 0              | -5.113307               | 3.495519  | 0.597840  |
| 39               | 1                | 0              | -0.017902               | -3.948581 | 2.722893  |

|    |   |   |           |           |           |
|----|---|---|-----------|-----------|-----------|
| 40 | 1 | 0 | -4.209467 | 1.479081  | -0.664879 |
| 41 | 1 | 0 | -2.580345 | 1.916635  | -0.194967 |
| 42 | 1 | 0 | -4.151520 | 3.747432  | 3.505465  |
| 43 | 1 | 0 | -5.786080 | 3.313555  | 3.016176  |
| 44 | 1 | 0 | -1.767033 | -4.136224 | 2.575581  |
| 45 | 1 | 0 | -3.604471 | -3.085627 | 1.196234  |
| 46 | 1 | 0 | -2.350304 | -2.688780 | 0.013328  |
| 47 | 1 | 0 | -2.680345 | -0.507684 | -0.865517 |
| 48 | 1 | 0 | -3.447246 | -0.691323 | 2.107355  |
| 49 | 1 | 0 | -4.406096 | 6.002219  | 2.380352  |
| 50 | 1 | 0 | -5.663271 | 5.752043  | 3.604842  |
| 51 | 1 | 0 | -6.050939 | 5.565231  | 1.884988  |
| 52 | 1 | 0 | 6.542379  | 1.624361  | -4.000753 |

#### 8. Tsa4

| Center<br>Number | Atomic<br>Number | Atomic<br>Type | Coordinates (Angstroms) |           |           |
|------------------|------------------|----------------|-------------------------|-----------|-----------|
|                  |                  |                | X                       | Y         | Z         |
| 1                | 8                | 0              | 5.908477                | 3.552258  | 0.465262  |
| 2                | 8                | 0              | 6.603451                | 1.477649  | 1.126663  |
| 3                | 6                | 0              | 2.630720                | -1.730361 | -0.438841 |
| 4                | 6                | 0              | 1.189133                | -2.160480 | -0.769293 |
| 5                | 6                | 0              | 2.806703                | -0.202742 | -0.361425 |
| 6                | 6                | 0              | 1.042041                | -3.677189 | -0.987881 |
| 7                | 6                | 0              | 4.208657                | 0.220085  | 0.113394  |
| 8                | 6                | 0              | -0.427000               | -4.128203 | -1.160350 |
| 9                | 6                | 0              | 4.396072                | 1.742938  | 0.085114  |
| 10               | 6                | 0              | -3.884443               | 1.536200  | 0.113534  |
| 11               | 6                | 0              | -3.996516               | 3.064424  | -0.041989 |
| 12               | 6                | 0              | -1.247095               | -3.917821 | 0.113285  |
| 13               | 6                | 0              | -3.199449               | 1.119464  | 1.426012  |
| 14               | 6                | 0              | -4.801641               | 3.496051  | -1.282194 |
| 15               | 6                | 0              | -2.586690               | -3.644877 | 0.128122  |
| 16               | 6                | 0              | -3.307500               | -2.826485 | 1.166407  |
| 17               | 6                | 0              | -3.079991               | -0.367535 | 1.675271  |
| 18               | 6                | 0              | 5.718976                | 2.190627  | 0.643050  |
| 19               | 6                | 0              | -3.444710               | -1.357551 | 0.844983  |
| 20               | 6                | 0              | -4.908413               | 5.023130  | -1.431826 |
| 21               | 1                | 0              | 2.932463                | -2.178469 | 0.520560  |
| 22               | 1                | 0              | 3.316048                | -2.137115 | -1.198803 |
| 23               | 1                | 0              | 0.523901                | -1.834177 | 0.045256  |
| 24               | 1                | 0              | 0.840371                | -1.630799 | -1.669180 |

|    |   |   |           |           |           |
|----|---|---|-----------|-----------|-----------|
| 25 | 1 | 0 | 2.603275  | 0.240316  | -1.349001 |
| 26 | 1 | 0 | 2.048015  | 0.207658  | 0.323184  |
| 27 | 1 | 0 | 1.483903  | -4.165249 | -0.105519 |
| 28 | 1 | 0 | 1.624907  | -3.961118 | -1.877120 |
| 29 | 1 | 0 | 5.003471  | -0.259915 | -0.472919 |
| 30 | 1 | 0 | 4.332635  | -0.138692 | 1.143812  |
| 31 | 1 | 0 | -0.480853 | -5.185889 | -1.452690 |
| 32 | 1 | 0 | -0.874759 | -3.488374 | -1.935244 |
| 33 | 1 | 0 | 3.635114  | 2.295662  | 0.654303  |
| 34 | 1 | 0 | 4.291010  | 2.083603  | -0.954818 |
| 35 | 1 | 0 | -3.323889 | 1.126324  | -0.739688 |
| 36 | 1 | 0 | -4.890589 | 1.093589  | 0.067597  |
| 37 | 1 | 0 | -4.466366 | 3.489406  | 0.859021  |
| 38 | 1 | 0 | -2.986613 | 3.500577  | -0.098169 |
| 39 | 1 | 0 | -0.623109 | -3.499330 | 0.916131  |
| 40 | 1 | 0 | -2.199082 | 1.571719  | 1.531406  |
| 41 | 1 | 0 | -3.802094 | 1.564610  | 2.235362  |
| 42 | 1 | 0 | -5.810941 | 3.061288  | -1.226144 |
| 43 | 1 | 0 | -4.332681 | 3.071089  | -2.182406 |
| 44 | 1 | 0 | -2.315004 | -5.147061 | -0.167578 |
| 45 | 1 | 0 | -2.798149 | -3.000785 | 2.130982  |
| 46 | 1 | 0 | -4.267797 | -3.375526 | 1.268609  |
| 47 | 1 | 0 | -2.708529 | -0.637181 | 2.667301  |
| 48 | 1 | 0 | -3.809196 | -1.132359 | -0.156197 |
| 49 | 1 | 0 | -5.403712 | 5.471001  | -0.560447 |
| 50 | 1 | 0 | -5.485487 | 5.298397  | -2.322886 |
| 51 | 1 | 0 | -3.914627 | 5.480901  | -1.521792 |
| 52 | 1 | 0 | 6.788723  | 3.828862  | 0.801369  |

## 9. Tsb1

| Center<br>Number | Atomic<br>Number | Atomic<br>Type | Coordinates (Angstroms) |          |           |
|------------------|------------------|----------------|-------------------------|----------|-----------|
|                  |                  |                | X                       | Y        | Z         |
| 1                | 8                | 0              | -6.183797               | 7.619546 | 0.312568  |
| 2                | 8                | 0              | -6.983685               | 5.500770 | -0.011561 |
| 3                | 6                | 0              | -2.634819               | 2.431575 | 0.455881  |
| 4                | 6                | 0              | -1.165776               | 2.039564 | 0.700012  |
| 5                | 6                | 0              | -2.887389               | 3.947370 | 0.556630  |
| 6                | 6                | 0              | -0.927482               | 0.520902 | 0.596400  |
| 7                | 6                | 0              | -4.360786               | 4.327487 | 0.325667  |
| 8                | 6                | 0              | 0.520210                | 0.076812 | 0.932549  |
| 9                | 6                | 0              | -4.593401               | 5.840965 | 0.428244  |

|    |   |   |           |           |           |
|----|---|---|-----------|-----------|-----------|
| 10 | 6 | 0 | 3.073060  | -5.186982 | -0.909393 |
| 11 | 6 | 0 | 3.814786  | -4.412306 | 0.194645  |
| 12 | 6 | 0 | 1.547888  | 0.653449  | -0.034962 |
| 13 | 6 | 0 | 2.058265  | -4.325853 | -1.701997 |
| 14 | 6 | 0 | 4.827240  | -5.273833 | 0.972976  |
| 15 | 6 | 0 | 1.946684  | 0.182749  | -1.313825 |
| 16 | 6 | 0 | 1.441497  | -1.176993 | -1.760820 |
| 17 | 6 | 0 | 2.714380  | -3.259532 | -2.548286 |
| 18 | 6 | 0 | -6.026552 | 6.246176  | 0.217937  |
| 19 | 6 | 0 | 2.457708  | -1.938926 | -2.580973 |
| 20 | 6 | 0 | 5.557763  | -4.493658 | 2.079245  |
| 21 | 1 | 0 | -2.944231 | 2.078404  | -0.539887 |
| 22 | 1 | 0 | -3.275515 | 1.908411  | 1.182583  |
| 23 | 1 | 0 | -0.528187 | 2.566966  | -0.024355 |
| 24 | 1 | 0 | -0.859424 | 2.387036  | 1.699543  |
| 25 | 1 | 0 | -2.568462 | 4.302146  | 1.549468  |
| 26 | 1 | 0 | -2.253551 | 4.469697  | -0.176899 |
| 27 | 1 | 0 | -1.184470 | 0.179506  | -0.416661 |
| 28 | 1 | 0 | -1.612715 | 0.002696  | 1.283397  |
| 29 | 1 | 0 | -4.997185 | 3.810876  | 1.056261  |
| 30 | 1 | 0 | -4.685576 | 3.975441  | -0.662458 |
| 31 | 1 | 0 | 0.562782  | -1.019204 | 0.926047  |
| 32 | 1 | 0 | 0.766218  | 0.399896  | 1.953327  |
| 33 | 1 | 0 | -3.981735 | 6.384574  | -0.305740 |
| 34 | 1 | 0 | -4.280963 | 6.221807  | 1.411171  |
| 35 | 1 | 0 | 2.540894  | -6.038283 | -0.459463 |
| 36 | 1 | 0 | 3.806870  | -5.614771 | -1.610375 |
| 37 | 1 | 0 | 4.335643  | -3.551976 | -0.250283 |
| 38 | 1 | 0 | 3.077102  | -3.997094 | 0.900550  |
| 39 | 1 | 0 | 1.862494  | 1.673214  | 0.205008  |
| 40 | 1 | 0 | 1.479788  | -4.993944 | -2.360274 |
| 41 | 1 | 0 | 1.334727  | -3.886376 | -1.003155 |
| 42 | 1 | 0 | 5.564662  | -5.687578 | 0.268635  |
| 43 | 1 | 0 | 4.306171  | -6.136536 | 1.415287  |
| 44 | 1 | 0 | 2.734865  | 0.180488  | -0.176496 |
| 45 | 1 | 0 | 0.591105  | -0.909446 | -2.419570 |
| 46 | 1 | 0 | 1.010588  | -1.813254 | -0.971598 |
| 47 | 1 | 0 | 3.492871  | -3.634024 | -3.216868 |
| 48 | 1 | 0 | 3.033657  | -1.309758 | -3.258040 |
| 49 | 1 | 0 | 6.111807  | -3.643509 | 1.660489  |
| 50 | 1 | 0 | 6.273963  | -5.130380 | 2.612687  |
| 51 | 1 | 0 | 4.847463  | -4.097726 | 2.817027  |
| 52 | 1 | 0 | -7.121950 | 7.874721  | 0.174507  |

---

## 10. Tsb2

---

| Center<br>Number | Atomic<br>Number | Atomic<br>Type | Coordinates (Angstroms) |           |           |
|------------------|------------------|----------------|-------------------------|-----------|-----------|
|                  |                  |                | X                       | Y         | Z         |
| 1                | 8                | 0              | -7.350681               | 4.852401  | -0.215722 |
| 2                | 8                | 0              | -5.986494               | 5.597580  | 1.462864  |
| 3                | 6                | 0              | -1.478435               | 2.822948  | 0.748778  |
| 4                | 6                | 0              | -0.470827               | 1.841731  | 0.120642  |
| 5                | 6                | 0              | -2.827015               | 2.874755  | 0.007403  |
| 6                | 6                | 0              | 0.868863                | 1.796949  | 0.880534  |
| 7                | 6                | 0              | -3.820801               | 3.866589  | 0.638412  |
| 8                | 6                | 0              | 1.963448                | 0.916742  | 0.226111  |
| 9                | 6                | 0              | -5.161680               | 3.901498  | -0.107235 |
| 10               | 6                | 0              | 1.060830                | -6.972856 | -0.189589 |
| 11               | 6                | 0              | -0.117411               | -6.903907 | 0.798393  |
| 12               | 6                | 0              | 1.587844                | -0.555213 | 0.224284  |
| 13               | 6                | 0              | 1.762394                | -5.610917 | -0.429039 |
| 14               | 6                | 0              | -0.792906               | -8.267848 | 1.035316  |
| 15               | 6                | 0              | 1.993023                | -1.454414 | 1.232684  |
| 16               | 6                | 0              | 1.371402                | -2.840103 | 1.160685  |
| 17               | 6                | 0              | 2.512990                | -5.107199 | 0.781398  |
| 18               | 6                | 0              | -6.154589               | 4.864347  | 0.483912  |
| 19               | 6                | 0              | 2.353076                | -3.951084 | 1.451348  |
| 20               | 6                | 0              | -1.980787               | -8.192942 | 2.009843  |
| 21               | 1                | 0              | -1.652988               | 2.541485  | 1.798599  |
| 22               | 1                | 0              | -1.037263               | 3.831418  | 0.768948  |
| 23               | 1                | 0              | -0.920602               | 0.838242  | 0.089984  |
| 24               | 1                | 0              | -0.285991               | 2.132002  | -0.925881 |
| 25               | 1                | 0              | -2.651661               | 3.149440  | -1.044766 |
| 26               | 1                | 0              | -3.271744               | 1.867223  | -0.005928 |
| 27               | 1                | 0              | 0.703166                | 1.441832  | 1.907377  |
| 28               | 1                | 0              | 1.264812                | 2.819838  | 0.960890  |
| 29               | 1                | 0              | -3.384247               | 4.874025  | 0.649895  |
| 30               | 1                | 0              | -3.995500               | 3.599832  | 1.689186  |
| 31               | 1                | 0              | 2.894183                | 1.034428  | 0.793860  |
| 32               | 1                | 0              | 2.139358                | 1.265473  | -0.801741 |
| 33               | 1                | 0              | -5.629970               | 2.907115  | -0.122925 |
| 34               | 1                | 0              | -5.018782               | 4.176138  | -1.162170 |
| 35               | 1                | 0              | 0.700937                | -7.358349 | -1.155171 |
| 36               | 1                | 0              | 1.802496                | -7.699006 | 0.177994  |
| 37               | 1                | 0              | 0.233707                | -6.500072 | 1.759090  |
| 38               | 1                | 0              | -0.866196               | -6.190836 | 0.417516  |
| 39               | 1                | 0              | 0.814192                | -0.839596 | -0.512061 |

|    |   |   |           |           |           |
|----|---|---|-----------|-----------|-----------|
| 40 | 1 | 0 | 2.476677  | -5.737035 | -1.258384 |
| 41 | 1 | 0 | 1.017245  | -4.880416 | -0.768458 |
| 42 | 1 | 0 | -0.045658 | -8.977221 | 1.422104  |
| 43 | 1 | 0 | -1.134545 | -8.675883 | 0.071784  |
| 44 | 1 | 0 | 2.732945  | -1.165078 | 0.137552  |
| 45 | 1 | 0 | 0.801012  | -3.028941 | 0.233965  |
| 46 | 1 | 0 | 0.623242  | -2.816501 | 1.975733  |
| 47 | 1 | 0 | 3.286009  | -5.789108 | 1.143076  |
| 48 | 1 | 0 | 3.001841  | -3.749890 | 2.302886  |
| 49 | 1 | 0 | -1.662069 | -7.819610 | 2.991738  |
| 50 | 1 | 0 | -2.439352 | -9.178093 | 2.158968  |
| 51 | 1 | 0 | -2.757748 | -7.515443 | 1.632117  |
| 52 | 1 | 0 | -7.991773 | 5.484140  | 0.177039  |

### 11. Tsb3

| Center<br>Number | Atomic<br>Number | Atomic<br>Type | Coordinates (Angstroms) |            |           |
|------------------|------------------|----------------|-------------------------|------------|-----------|
|                  |                  |                | X                       | Y          | Z         |
| 1                | 8                | 0              | -6.838714               | 6.223570   | -1.426406 |
| 2                | 8                | 0              | -5.684631               | 6.916893   | 0.423068  |
| 3                | 6                | 0              | -1.639235               | 3.432259   | 0.749511  |
| 4                | 6                | 0              | -0.723164               | 2.248577   | 0.385627  |
| 5                | 6                | 0              | -2.818767               | 3.614218   | -0.223351 |
| 6                | 6                | 0              | 0.463256                | 2.083071   | 1.353905  |
| 7                | 6                | 0              | -3.725465               | 4.803316   | 0.142277  |
| 8                | 6                | 0              | 1.452261                | 0.952905   | 0.968027  |
| 9                | 6                | 0              | -4.892024               | 4.967875   | -0.841031 |
| 10               | 6                | 0              | 0.173277                | -6.903013  | 0.027113  |
| 11               | 6                | 0              | 0.501073                | -8.179109  | 0.826879  |
| 12               | 6                | 0              | 0.871494                | -0.438579  | 1.050452  |
| 13               | 6                | 0              | 0.088814                | -5.622382  | 0.885881  |
| 14               | 6                | 0              | 0.575214                | -9.442399  | -0.051644 |
| 15               | 6                | 0              | 1.306720                | -1.400868  | 1.879911  |
| 16               | 6                | 0              | 0.726875                | -2.792301  | 1.968275  |
| 17               | 6                | 0              | 1.438541                | -5.132473  | 1.400034  |
| 18               | 6                | 0              | -5.798037               | 6.123608   | -0.516164 |
| 19               | 6                | 0              | 1.776958                | -3.884929  | 1.983433  |
| 20               | 6                | 0              | 0.890506                | -10.716681 | 0.749798  |
| 21               | 1                | 0              | -2.028447               | 3.289807   | 1.769442  |
| 22               | 1                | 0              | -1.043442               | 4.357926   | 0.773094  |
| 23               | 1                | 0              | -1.321544               | 1.325865   | 0.366793  |
| 24               | 1                | 0              | -0.336838               | 2.390753   | -0.636465 |

|    |   |   |           |            |           |
|----|---|---|-----------|------------|-----------|
| 25 | 1 | 0 | -2.427398 | 3.751893   | -1.243744 |
| 26 | 1 | 0 | -3.416935 | 2.689483   | -0.244204 |
| 27 | 1 | 0 | 0.085285  | 1.895877   | 2.369673  |
| 28 | 1 | 0 | 1.020283  | 3.031402   | 1.394777  |
| 29 | 1 | 0 | -3.134563 | 5.728574   | 0.164628  |
| 30 | 1 | 0 | -4.120775 | 4.671180   | 1.158177  |
| 31 | 1 | 0 | 2.332993  | 1.012313   | 1.621791  |
| 32 | 1 | 0 | 1.809650  | 1.144297   | -0.057147 |
| 33 | 1 | 0 | -5.510096 | 4.059375   | -0.875072 |
| 34 | 1 | 0 | -4.524326 | 5.111602   | -1.867159 |
| 35 | 1 | 0 | -0.787205 | -7.047625  | -0.488106 |
| 36 | 1 | 0 | 0.927102  | -6.761109  | -0.762885 |
| 37 | 1 | 0 | 1.457293  | -8.059121  | 1.358119  |
| 38 | 1 | 0 | -0.266285 | -8.322493  | 1.603965  |
| 39 | 1 | 0 | 0.040106  | -0.660237  | 0.377382  |
| 40 | 1 | 0 | -0.402364 | -4.825549  | 0.312456  |
| 41 | 1 | 0 | -0.559466 | -5.808325  | 1.757255  |
| 42 | 1 | 0 | 1.341714  | -9.297522  | -0.827776 |
| 43 | 1 | 0 | -0.380520 | -9.569241  | -0.582102 |
| 44 | 1 | 0 | 2.152172  | -1.210210  | 2.541690  |
| 45 | 1 | 0 | -0.082031 | -2.908450  | 1.224726  |
| 46 | 1 | 0 | 0.240254  | -2.915160  | 2.957194  |
| 47 | 1 | 0 | 2.184694  | -5.923305  | 1.520029  |
| 48 | 1 | 0 | 2.191767  | -4.335158  | 0.734191  |
| 49 | 1 | 0 | 1.855862  | -10.629951 | 1.265065  |
| 50 | 1 | 0 | 0.937339  | -11.597014 | 0.097706  |
| 51 | 1 | 0 | 0.122030  | -10.904076 | 1.510899  |
| 52 | 1 | 0 | -7.423286 | 6.981257   | -1.206149 |

## 12. Tsb4

| Center<br>Number | Atomic<br>Number | Atomic<br>Type | Coordinates (Angstroms) |           |           |
|------------------|------------------|----------------|-------------------------|-----------|-----------|
|                  |                  |                | X                       | Y         | Z         |
| 1                | 8                | 0              | 6.419862                | 3.529594  | -0.473665 |
| 2                | 8                | 0              | 6.912984                | 1.672993  | 0.768485  |
| 3                | 6                | 0              | 2.747443                | -1.563823 | -0.113637 |
| 4                | 6                | 0              | 1.402273                | -2.063269 | -0.673084 |
| 5                | 6                | 0              | 3.124052                | -0.150430 | -0.595783 |
| 6                | 6                | 0              | 1.038748                | -3.480154 | -0.189849 |
| 7                | 6                | 0              | 4.470873                | 0.338792  | -0.033682 |
| 8                | 6                | 0              | -0.276159               | -4.043915 | -0.787701 |
| 9                | 6                | 0              | 4.829162                | 1.747472  | -0.526624 |

|    |   |   |           |           |           |
|----|---|---|-----------|-----------|-----------|
| 10 | 6 | 0 | -4.171686 | 1.375004  | 0.129774  |
| 11 | 6 | 0 | -4.171545 | 2.911132  | 0.236951  |
| 12 | 6 | 0 | -1.518113 | -3.291494 | -0.375416 |
| 13 | 6 | 0 | -4.439872 | 0.690658  | 1.478567  |
| 14 | 6 | 0 | -3.913113 | 3.611768  | -1.110301 |
| 15 | 6 | 0 | -2.515761 | -3.824477 | 0.347919  |
| 16 | 6 | 0 | -3.789519 | -3.124879 | 0.788141  |
| 17 | 6 | 0 | -4.412766 | -0.832915 | 1.475178  |
| 18 | 6 | 0 | 6.140127  | 2.258578  | 0.004127  |
| 19 | 6 | 0 | -3.799724 | -1.634394 | 0.492374  |
| 20 | 6 | 0 | -3.908836 | 5.146047  | -1.003232 |
| 21 | 1 | 0 | 2.708336  | -1.572814 | 0.986640  |
| 22 | 1 | 0 | 3.544103  | -2.268037 | -0.399880 |
| 23 | 1 | 0 | 0.609268  | -1.358118 | -0.385690 |
| 24 | 1 | 0 | 1.441981  | -2.056241 | -1.774078 |
| 25 | 1 | 0 | 3.160620  | -0.141663 | -1.696559 |
| 26 | 1 | 0 | 2.328004  | 0.554079  | -0.307657 |
| 27 | 1 | 0 | 0.961629  | -3.483720 | 0.907458  |
| 28 | 1 | 0 | 1.860002  | -4.165097 | -0.450571 |
| 29 | 1 | 0 | 5.268584  | -0.360202 | -0.318025 |
| 30 | 1 | 0 | 4.439783  | 0.333594  | 1.063932  |
| 31 | 1 | 0 | -0.374356 | -5.098689 | -0.494085 |
| 32 | 1 | 0 | -0.186934 | -4.031280 | -1.886351 |
| 33 | 1 | 0 | 4.051263  | 2.472158  | -0.246581 |
| 34 | 1 | 0 | 4.878790  | 1.779570  | -1.624374 |
| 35 | 1 | 0 | -3.214560 | 1.020892  | -0.271403 |
| 36 | 1 | 0 | -4.933747 | 1.060077  | -0.599389 |
| 37 | 1 | 0 | -5.136754 | 3.254861  | 0.642147  |
| 38 | 1 | 0 | -3.403307 | 3.227727  | 0.960374  |
| 39 | 1 | 0 | -1.607009 | -2.255285 | -0.696476 |
| 40 | 1 | 0 | -3.675289 | 1.002992  | 2.208289  |
| 41 | 1 | 0 | -5.400878 | 1.032214  | 1.891941  |
| 42 | 1 | 0 | -4.680276 | 3.296344  | -1.833297 |
| 43 | 1 | 0 | -2.949528 | 3.268560  | -1.515216 |
| 44 | 1 | 0 | -2.442763 | -4.866562 | 0.667843  |
| 45 | 1 | 0 | -3.965211 | -3.349227 | 1.861759  |
| 46 | 1 | 0 | -4.630256 | -3.590792 | 0.245155  |
| 47 | 1 | 0 | -4.733847 | -1.275638 | 2.438269  |
| 48 | 1 | 0 | -5.088049 | -1.157136 | 0.431209  |
| 49 | 1 | 0 | -4.872323 | 5.518519  | -0.631352 |
| 50 | 1 | 0 | -3.722895 | 5.614138  | -1.977418 |
| 51 | 1 | 0 | -3.129087 | 5.491186  | -0.311728 |
| 52 | 1 | 0 | 7.277419  | 3.853842  | -0.121828 |

---



## Supplemental files

**Fig. S1** C18:2 isomerization schemes of the reactant C18:2-9c,12c, transition states (ts), intermediates (im), and the products (C18:2-9c,12t, C18:2-9t,12c, C18:2-9t,12t).

**Fig. S2** Energy (E) curves of the IRC isomerization reaction schemes.

**Fig. S3** C18:2-9c12t degradation scheme of reactant (C18:2-9c12t and O<sub>2</sub>), transition states, and the product (aldehydes and olefinic alcohol).

**Fig. S4** Energy (E) curves of the Hydroperoxide degradation reaction scheme.

Fig. S1

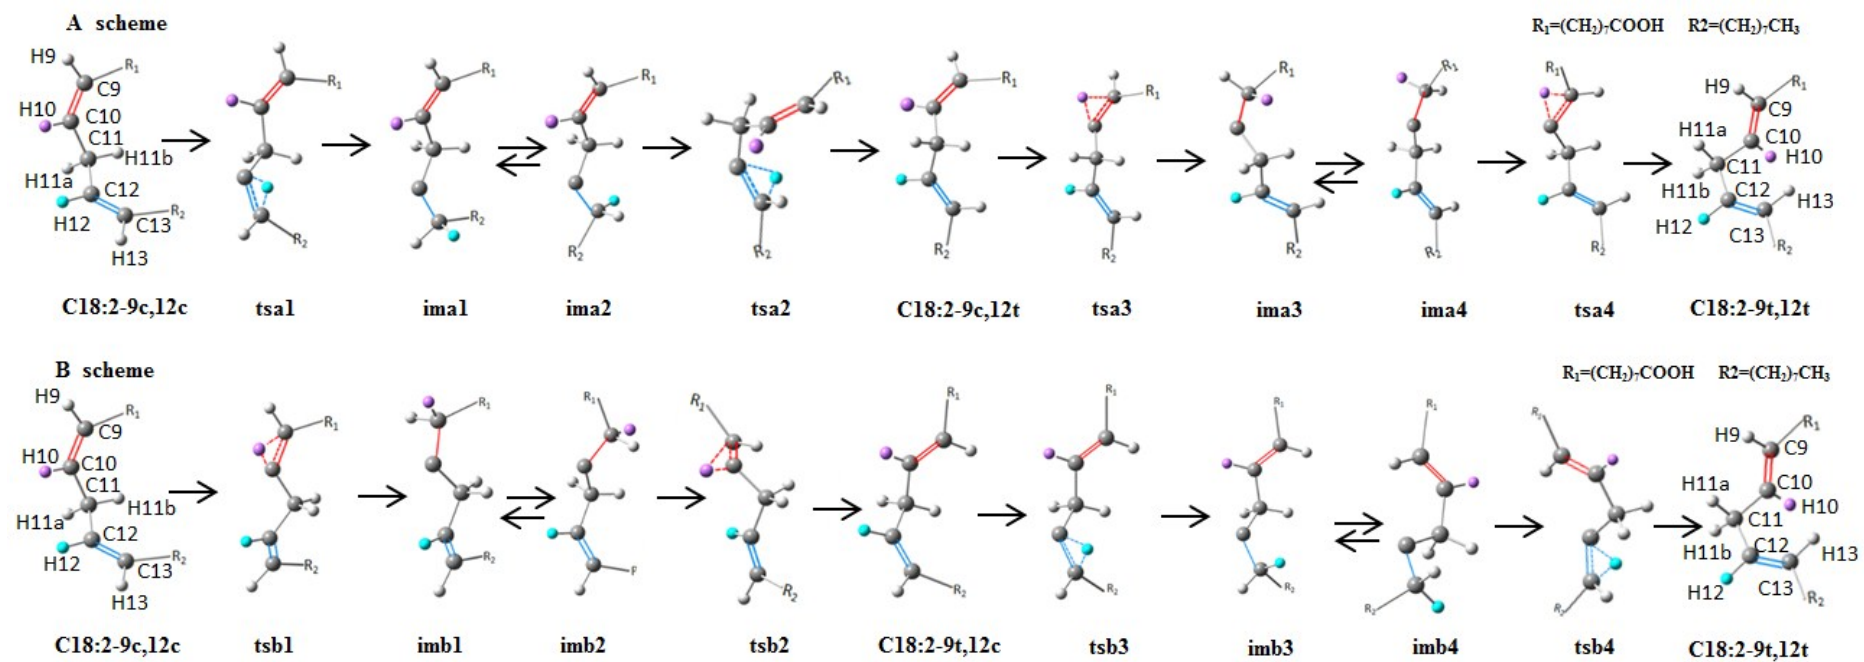

Fig. S2

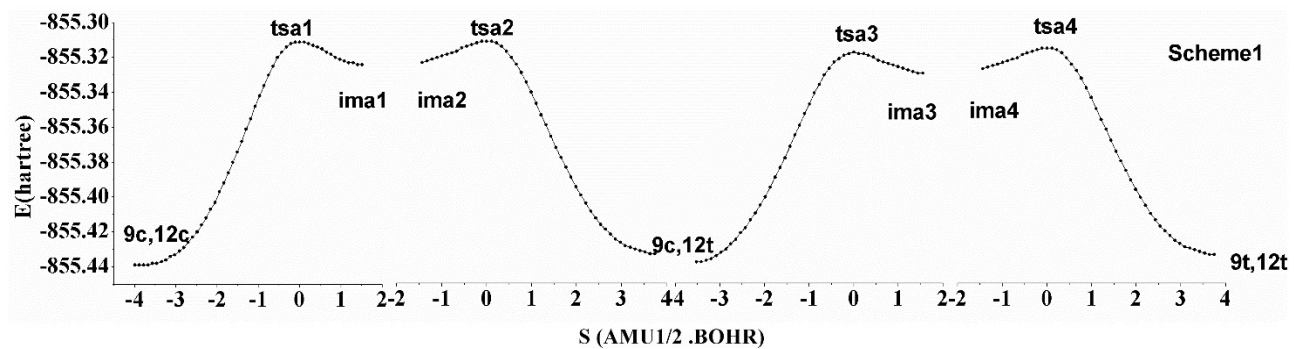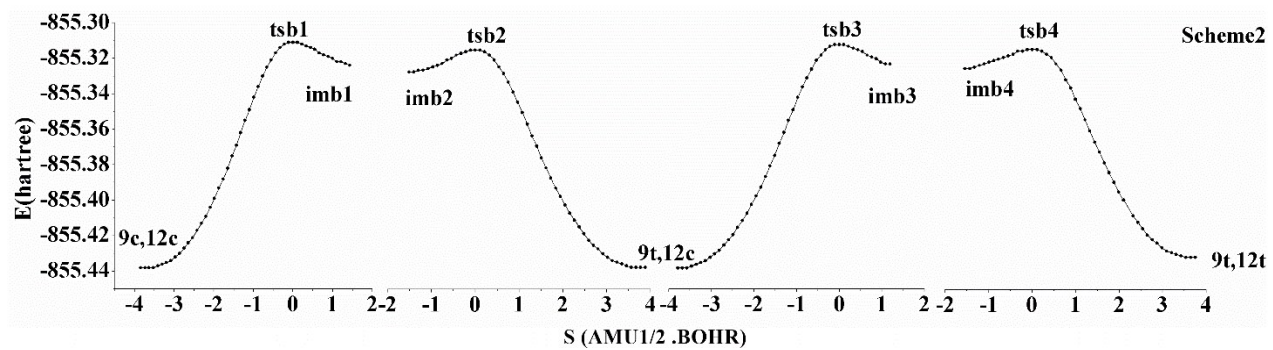

Fig. S3

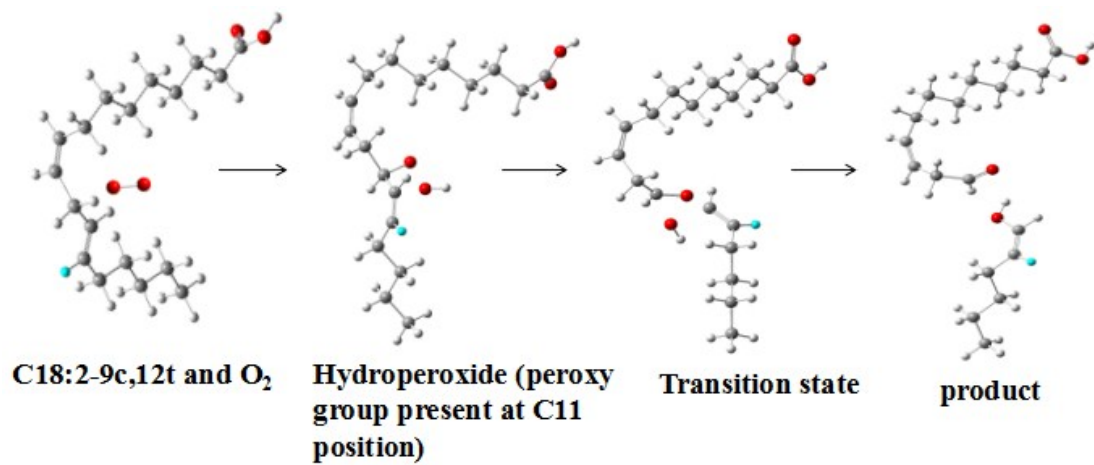

Fig.S4

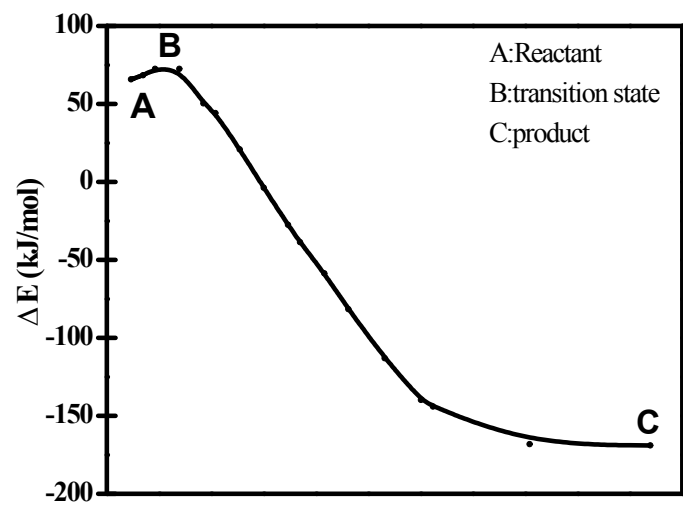

Supplement: c9ra00328b1.pdf [file c9ra00328b1.pdf]
